# Supplementary material for: Reliability and validity of a new accelerometer-based device for detecting physical activities and energy expenditure
Source: PeerJ journal article supplement (doi:10.7717/peerj.5775), 2018-10-11
Supplement: Raw_data_for_reliability_protocol_staff.xlsx [file Raw_data_for_reliability_protocol_staff.xlsx]

## Sheet: Activity types detection
Fibion thigh						ActiGraph
walking 1(min)	walking 2 (min)	sitting 1 (min)	sitting 2 (min)	standing 1 (min)	standing 2 (min)	walking 1(min)	walking 2 (min)	sitting 1 (min)	sitting 2 (min)	standing 1 (min)	standing 2 (min)
14.15	14.9	14.5	13.7167	13.6333	12.7333	14.6667	14.7833	12.0167	12.85	11.9	10.9333
14.6167	14.9	14.4667	14.3833	11.9	13.6	14.9333	14.8333	14.8667	14.4167	14.6	14.7
14.85	14	14.4667	13.6667	14.3167	12.9167	14.4833	14.3833	12.25	12.9167	13.5667	13.5
14.4667	14.75	14.4	14.3167	14.35	14.3333	14.2667	14.3333	14.1667	13.9167	14.3833	14.5167
14.8833	14	14.5167	14.25	14.1667	13.1667	14.5	14.6167	12.05	13.9	11.85	13.3833
14.35	14.6833	14.45	14.4333	13.4833	14.05	14.6667	14.4667	14.8333	14.8	14.15	13.8333
14.2167	15	14.3167	13.5333	12.1833	13.5167	14.4667	14.0333	14.3	13.9833	14.3833	14.2333
14.15	14.7667	14.4	14.3833	13.3667	11.6	14.8167	14.4333	14.95	14.8333	14.75	14.8833
14.8333	14.9	14.4167	13.6333	13.6	12.3	14.9833	13.7167	12.25	15.65	13.5667	13
14.4667	14.1667	14.3167	14.2667	14.0167	13.0333	14.4667	13.9833	14.8667	14.0333	14.5667	14.6167
14.7333	14	14.4333	14.1	13.3833	12.7	15	14.95	12.1833	13.7167	11.7833	11.8667
14.4333	14.6667	14.4333	14.35	11.3167	10.8667	14.8333	14.8	14.85	14.9667	14.4833	14
13.6	13.9333	14.8667	14.5833	14.6667	14.2	15.7333	15.3833	15	13.6667	13.6667	13.9167
14.8333	14.35	14.5333	14.1667	13.35	13.25	16	16	15	15	15	16
13.2667	13.8333	13.55	14.05	14.1833	13.8667	16	15.4833	15	15	15	16
15.0167	14.7833	14.9167	14.5833	11.6667	12.3833	12.6833	16	15	12.7333	15	11.5333
14.7	14.4167	14.3167	14.45	12.45	12.5167	16	12.15	15	13.0167	13.8167	15.4667
14.45	14.6667	13.8667	14.35	14.3833	12.6833	15	14.3833	15	12.3167	12.4167	13.6167
Annotation:

## Sheet: Energy expenditure estimation
Fibion thigh						ActiGraph
sitting 1 (kcal/min)	sitting 2 (kcal/min)	standing 1 (kcal/min)	standing 2 (kcal/min)	walking 1 (kcal/min)	walking 2 (kcal/min)	sitting 1 (kcal/min)	sitting 2 (kcal/min)	standing 1 (kcal/min)	standing 2 (kcal/min)	walking 1 (kcal/min)	walking 2 (kcal/min)
1.39975	1.38663	1.78791	1.6065	3.48916	3.72096	1.23333	1.40353	1.60333	1.704	3.9109	3.5416
1.10005	1.25644	1.58183	1.40782	2.8353	2.53911	1.46667	1.50627	1.76	1.96533	3.9336	3.7752
1.44715	1.32878	1.92103	1.78311	4.31848	4.60659	1.28333	1.36695	1.28333	1.6478	4.0964	3.26352
1.3586	1.26087	1.95356	2.14	3.84155	3.57866	1.6425	1.569	2.0025	1.884	3.864	4.227
1.37254	1.45315	1.34703	1.71654	3.88964	4.21649	1.1	1.243	2.11	2.1	3.659	3.445
1.00542	1.13234	1.65248	1.53127	2.50593	2.82824	1.515	1.79107	1.818	2.02	3.53332	3.83463
1.60349	1.52981	2.2592	2.03275	4.37826	4.5697	1.60349	1.52981	2.2592	2.03275	4.37826	4.5697
1.15333	1.41673	1.931	1.77302	3.51487	2.52394	1.15333	1.41673	1.931	1.77302	3.51487	2.52394
1.23468	1.33501	1.86529	1.92322	4.22807	4.20034	1.23468	1.33501	1.86529	1.92322	4.22807	4.20034
1.01556	1.15873	1.55604	1.30091	3.09165	2.93865	1.01556	1.15873	1.55604	1.30091	3.09165	2.93865
1.53648	1.66342	1.55043	1.73476	3.21466	3.18505	1.53648	1.66342	1.55043	1.73476	3.21466	3.18505
1.35261	1.48282	1.90147	1.5009	3.35455	2.58829	1.35261	1.48282	1.60147	1.5009	3.35455	2.58829
1.01045	1.00542	1.56643	1.61232	4.10129	4.16147	1.01045	1.00542	1.56643	1.61232	4.10129	4.16147
1.49319	1.30349	1.9491	2.12981	2.86515	3.46518	1.49319	1.30349	1.9491	2.12981	2.86515	3.46518
1.13561	1.15333	1.42064	1.41673	3.2856	3.9351	1.13561	1.15333	1.42064	1.41673	3.2856	3.9351
1.31882	1.43468	1.56068	1.53501	2.89183	2.45181	1.31882	1.43468	1.56068	1.53501	2.89183	2.45181
0.989607	1.01556	1.56643	1.61232	2.40391	2.9224	0.989607	1.01556	1.56643	1.61232	2.40391	2.9224
1.47377	1.53648	1.85828	1.86342	3.04555	3.39804	1.47377	1.53648	1.85828	1.86342	3.04555	3.39804
Annotation:
